# Supplementary material for: An Investigation of Employee Involvement Schemes and Governance Structures in Professional Employment.
Source: eLife journal article supplement (doi:10.7554/elife.08401), 1995-12-01
Supplement: supp [file elife-08401-supp-v1.zip]

**Figure 5-source data 2.** % of apoptosis induced by 5-FU in HCT116 cells with and without mutp53

|                                 | Con siRNA   |              |             | BAG2 siRNA-1 |              |              | BAG2 siRNA-2 |              |              |
|---------------------------------|-------------|--------------|-------------|--------------|--------------|--------------|--------------|--------------|--------------|
| Time of 5-FU treatment (h)      | 0           | 24           | 48          | 0            | 24           | 48           | 0            | 24           | 48           |
| HCT116 p53 <sup>-/-</sup>       | 9.367±1.554 | 58.367±4.805 | 82.2±1.076  | 18.033±0.759 | 61.783±3.792 | 92.283±0.558 | 17.867±0.382 | 64.883±4.17  | 92.5±1.532   |
| HCT116 p53 R248W <sup>-/-</sup> | 8.367±0.621 | 39.517±4.781 | 64.15±0.721 | 14.05±0.173  | 55.7±2.656   | 88.65±0.568  | 14.85±2.97   | 62.393±1.508 | 89.667±2.627 |

Note: Source data for Figure 5c. Data are presented as mean±SD.
