# Supplementary material for: An Investigation of Employee Involvement Schemes and Governance Structures in Professional Employment.
Source: eLife journal article supplement (doi:10.7554/elife.08401), 1995-12-01
Supplement: supp [file elife-08401-supp-v1.zip]

**Figure 5-source data 1.** % of apoptosis induced by 5-FU in Saos2 cells with and without ectopic expression of mutp53

|                            | Con siRNA   |              | BAG2 siRNA-1 |              | BAG2 siRNA-2 |              |
|----------------------------|-------------|--------------|--------------|--------------|--------------|--------------|
| Time of 5-FU treatment (h) | 0           | 48           | 0            | 48           | 0            | 48           |
| Saos2-Con                  | 6.235±3.48  | 60.49±6.61   | 9.925±3.909  | 66.05±2.022  | 14.35±3.733  | 65.84±8.074  |
| Saos2-R175H                | 4.675±3.208 | 38.9±2.758   | 8.875±5.205  | 55.863±3.096 | 8.793±2.322  | 60.55±7.266  |
| Saos2-R248W                | 7.88±0.543  | 31.373±2.747 | 13.933±2.759 | 52.633±1.601 | 13.033±4.554 | 64.99±2.319  |
| Saos2-R273H                | 6.837±0.383 | 32.433±4.291 | 9±2.879      | 50.1±7.031   | 13.467±5.398 | 52.533±9.248 |

Note: Source data for Figure 5a. Data are presented as mean±SD.
