# Supplementary material for: An Investigation of Employee Involvement Schemes and Governance Structures in Professional Employment.
Source: eLife journal article supplement (doi:10.7554/elife.08401), 1995-12-01
Supplement: supp [file elife-08401-supp-v1.zip]

**Figure 4-source data 1. % of cells with different BAG2 localization in H1299 cells**

|                  | N           | N>C          | N=C         | N<C         | C           |
|------------------|-------------|--------------|-------------|-------------|-------------|
| Vector           |             |              |             |             |             |
| Con              | 0.005±0.004 | 0.0154±0.009 | 0.033±0.006 | 0.791±0.01  | 0.156±0.02  |
| mutp53 R175H     | 0.085±0.016 | 0.709±0.039  | 0.143±0.052 | 0.041±0.003 | 0.022±0.009 |
| mutp53 R248W     | 0.144±0.012 | 0.701±0.067  | 0.125±0.061 | 0.025±0.014 | 0.006±0.008 |
| mutp53 R273H     | 0.177±0.013 | 0.722±0.022  | 0.068±0.020 | 0.029±0.01  | 0.004±0.005 |
| wtp53            | 0.007±0.006 | 0.020±0.013  | 0.032±0.020 | 0.77±0.031  | 0.172±0.021 |
| mutp53 R175H-NLS | 0.001±0.006 | 0.014±0.013  | 0.035±0.020 | 0.684±0.031 | 0.268±0.021 |

Note: Source data for Figure 4a. Data are presented as mean±SD.
