# Supplementary figures and images for: An Investigation of Employee Involvement Schemes and Governance Structures in Professional Employment.
Source: eLife journal article supplement (doi:10.7554/elife.08401), 1995-12-01

Figure 3-figure supplement 2

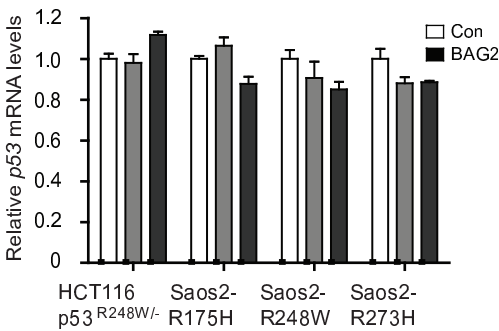

Supplement: supp [file elife-08401-supp-v1.zip]

Figure 2-figure supplement 1

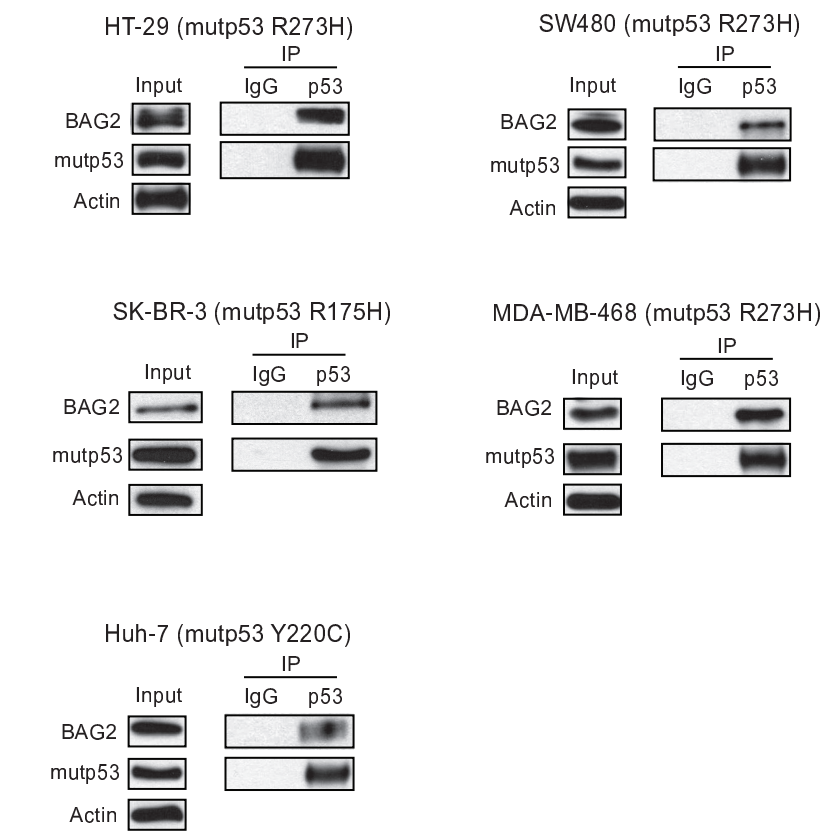

Supplement: supp [file elife-08401-supp-v1.zip]

Figure 3-figure supplement 1

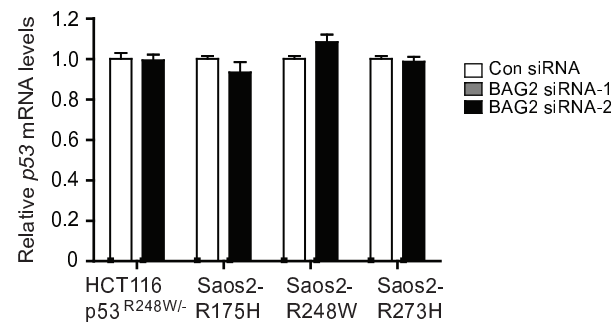

Supplement: supp [file elife-08401-supp-v1.zip]

Figure 6-figure supplement 2

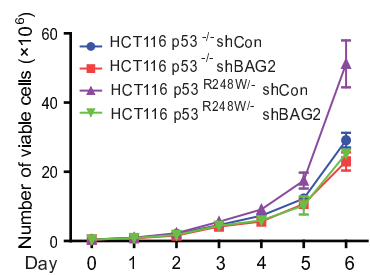

Supplement: supp [file elife-08401-supp-v1.zip]

Figure 2-figure supplement 2

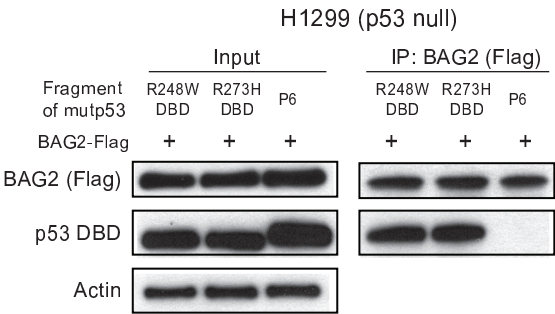

Supplement: supp [file elife-08401-supp-v1.zip]

Figure 1-figure supplement 1

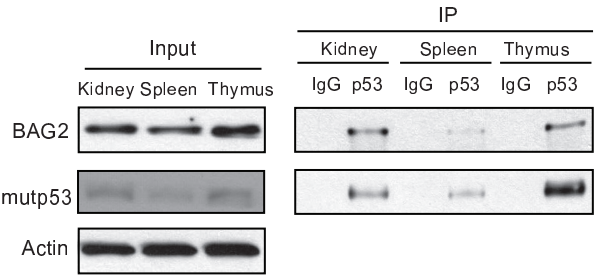

Supplement: supp [file elife-08401-supp-v1.zip]

Figure 3-figure supplement 3

**a**

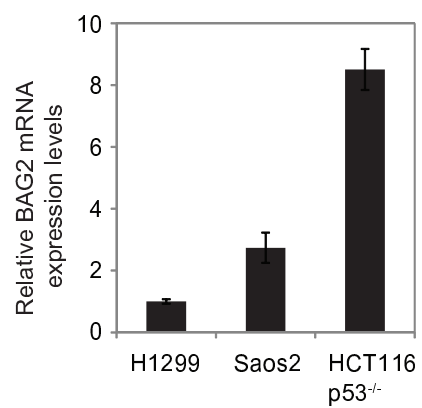

**b**

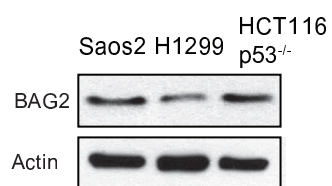

Supplement: supp [file elife-08401-supp-v1.zip]

Figure 6-figure supplement 1

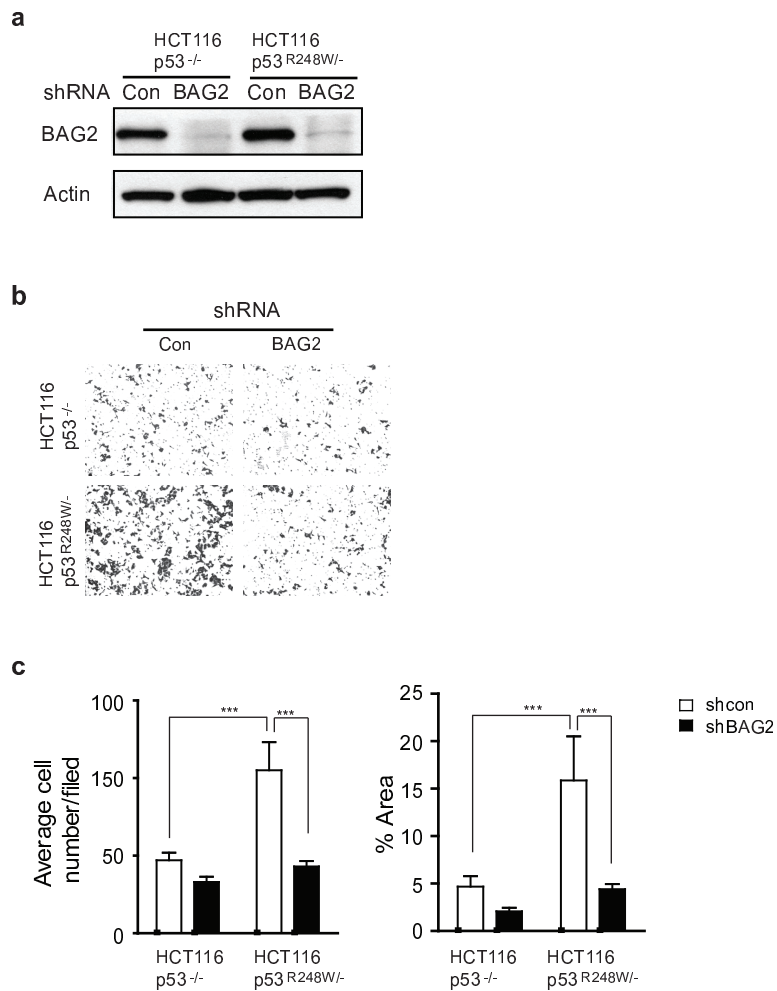

Supplement: supp [file elife-08401-supp-v1.zip]

Figure 7-figure supplement 1

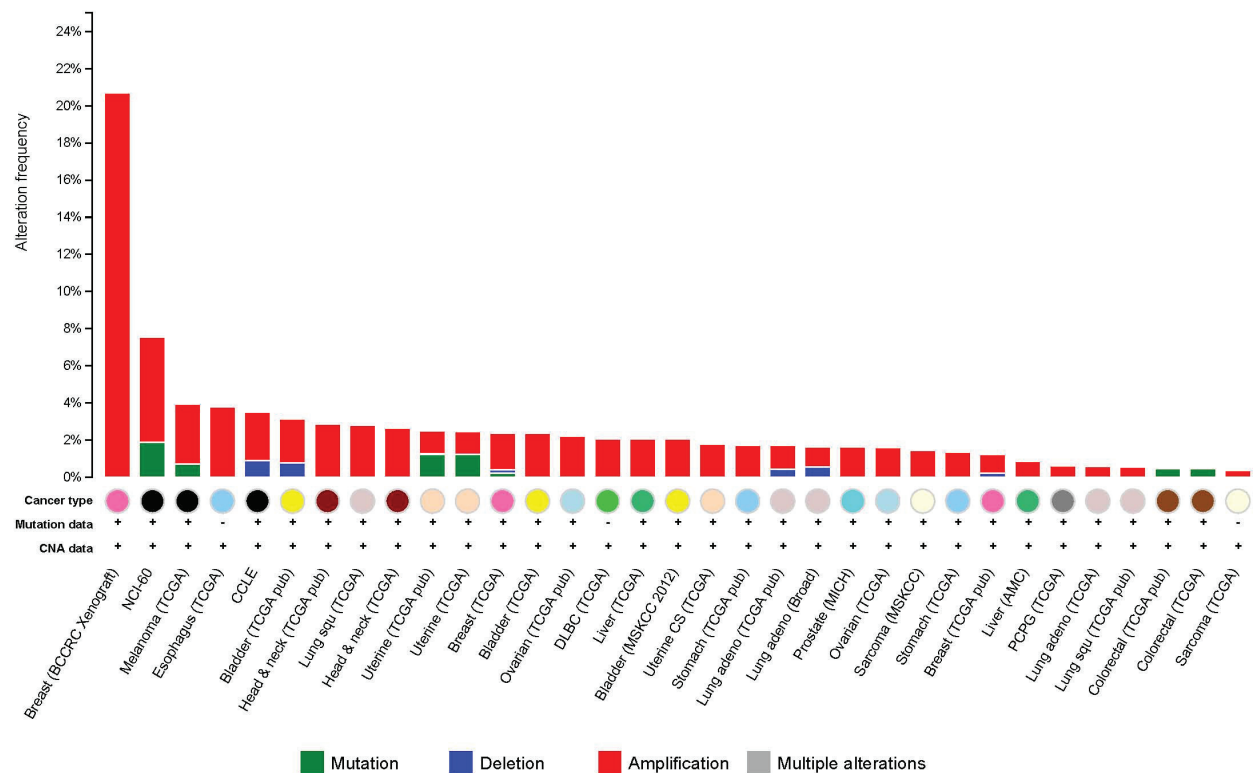

Supplement: supp [file elife-08401-supp-v1.zip]
